# Supplementary material for: Polyurea dendrimer for efficient cytosolic siRNA delivery
Source: Royal Society of Chemistry journal article supplement (doi:10.1039/c4ra09603g), 2014-01-01
Supplement: c4ra09603g1.pdf [file c4ra09603g1.pdf]

## Supporting information

### Polyurea dendrimer for efficient cytosolic siRNA delivery

Rita B. Restani,<sup>a</sup> João Conde,<sup>b,c,d</sup> Pedro V. Baptista,<sup>b</sup> Maria Teresa Cidade,<sup>e</sup> Ana M. Bragança,<sup>f</sup> Jorge Morgado,<sup>f,g</sup> Ilídio J. Correia,<sup>h</sup> Ana Aguiar-Ricardo<sup>a,\*</sup> and Vasco D. B. Bonifácio<sup>f,\*</sup>

<sup>a</sup> REQUIMTE, Departamento de Química, Faculdade de Ciências e Tecnologia, Universidade Nova de Lisboa, Campus de Caparica, 2829-516 Caparica, Portugal.

<sup>b</sup> CIGMH, Departamento de Ciências da Vida, Faculdade de Ciências e Tecnologia, Universidade Nova de Lisboa, Campus de Caparica, 2829-516 Caparica, Portugal.

<sup>c</sup> Instituto de Nanociencia de Aragon, Universidad de Zaragoza, Zaragoza, Spain.

<sup>d</sup> Current address: Massachusetts Institute of Technology, Harvard-MIT Biomedical Engineering Center, E25-449, Cambridge, Massachusetts, USA.

<sup>e</sup> Departamento de Ciências dos Materiais e CENIMAT, Faculdade de Ciências e Tecnologia, Universidade Nova de Lisboa, Campus de Caparica, 2829-516 Caparica, Portugal.

<sup>f</sup> Instituto de Telecomunicações, Instituto Superior Técnico, Av. Rovisco Pais, 1049-001 Lisboa, Portugal.

<sup>g</sup> Departamento de Bioengenharia, Instituto Superior Técnico, Av. Rovisco Pais, 1049-001 Lisboa, Portugal.<sup>h</sup> CICS-UBI Health Sciences Research Center, University of Beira Interior, Avenida Infante D. Henrique, 6200-506 Covilhã, Portugal.

#### Corresponding Authors

\*Tel. +351 212949648; Email: [air@fct.unl.pt](mailto:air@fct.unl.pt) (A.A.R.), [vasco.bonifacio@tecnico.ulisboa.pt](mailto:vasco.bonifacio@tecnico.ulisboa.pt) (V.D.B.B.).

#### Table of contents

|                 |    |
|-----------------|----|
| Figure S1 ..... | S2 |
| Figure S2 ..... | S2 |
| Figure S3 ..... | S3 |
| Figure S4 ..... | S3 |
| Figure S5 ..... | S4 |

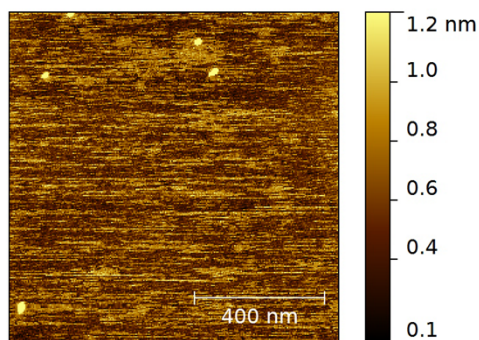

**Figure S1.** AFM topographical non-contact image of a PURE-G4 dendrimer on a mica surface (scan area  $1 \times 1 \mu\text{m}$ ).

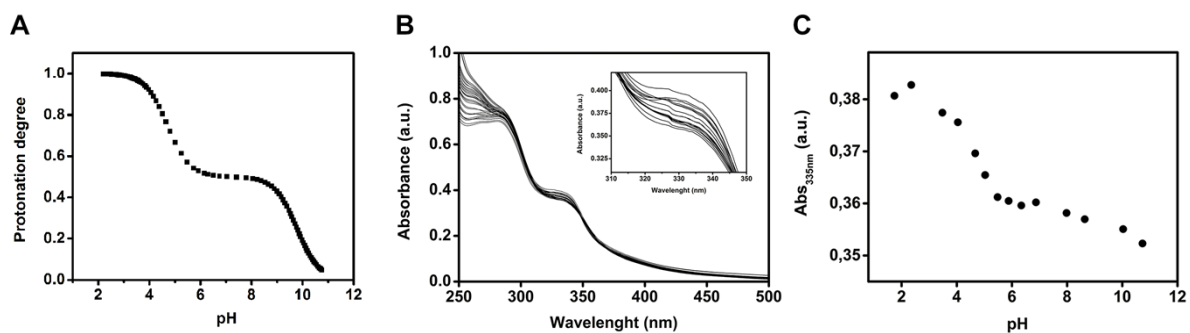

**Figure S2.** (A) Protonation degree of PURE-G4 versus pH (A). (B) Absorption spectra of PURE-G4 aqueous solutions at different pHs (the inset shows a magnification of the absorbance spectra at  $\lambda_{\text{max}} = 335 \text{ nm}$ ). (C) Plot of the pH dependence of the absorbance at 335 nm.

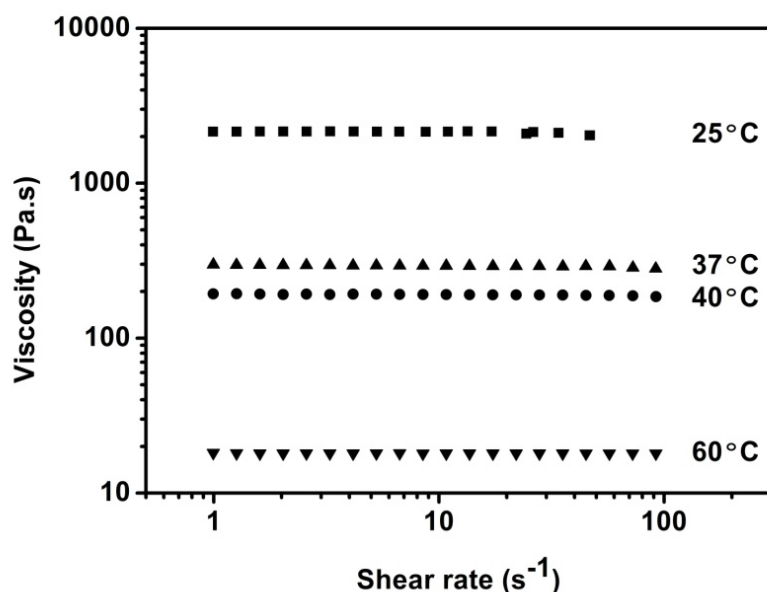

**Figure S3.** Viscosity of PURE-G4 *versus* the shear rate measured at different temperatures (25, 37, 40 and 60 °C).

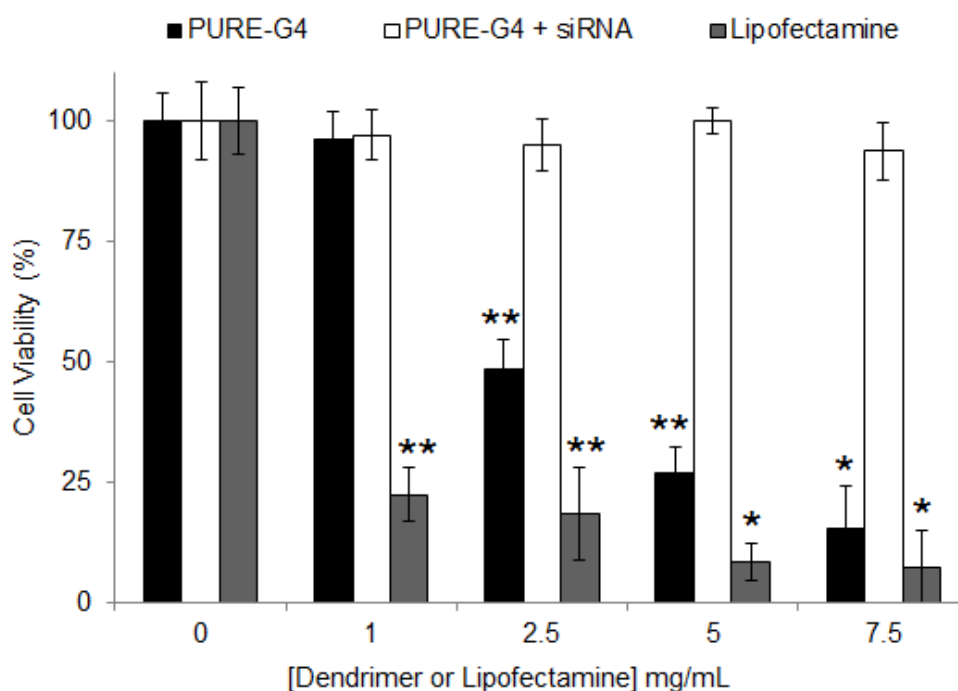

**Figure S4.** Cell viability via the MTT assay of PURE-G4 (1, 2.5, 5 and 7.5 mg/mL) and PURE-G4 complexed with siRNA (1, 2.5, 5 and 7.5 mg/mL of dendrimer pre-incubated with 10  $\mu$ M of siRNA), compared with the commercial delivery vector Lipofectamine. All the assays were performed in HepG2 cells at 48 hours of exposure (\*,  $P < 0.05$ ; \*\*,  $P < 0.001$ ).

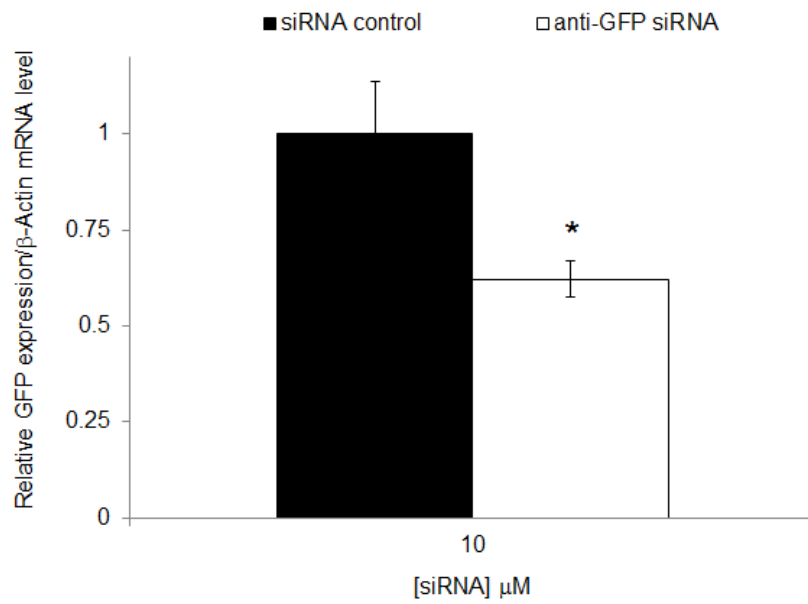

**Figure S5.** GFP silencing was compared using the same siRNA concentration (10 μM) on PURE-G4-siRNA dendriplexes with a commercially transfection agent – Lipofectamine 2000® (1.5 mg) by Real-Time PCR. β-Actin was used a reference gene. All the assays were performed in HepG2 cells at 48 hours of exposure (\*,  $P < 0.05$ ).
